# Supplementary material
Source: Royal Society of Chemistry journal article supplement (doi:10.1039/d6dt00392c)
Supplement: d6dt00392c1.pdf [file d6dt00392c1.pdf]

**Supplementary information for**  
**Competitive Coordination of Uranium(VI) and Thorium(IV) by Tetradentate**  
**Phenanthroline Ligands: Structural and Spectroscopic Investigation of U(VI)-Th(IV)**  
**Mixed Ion Pair Formation**

Svetlana V. Gutorova<sup>[a,b]\*</sup>, Petr I. Matveev<sup>[a]</sup>, Mariia V. Evsiunina<sup>[a]</sup>, Qiushi Wang<sup>[a]</sup>, Pavel S. Lempert<sup>[a]</sup>, Paulina Kalle<sup>[c]</sup>, Daniil S. Koshelev<sup>[a], [d]</sup>, Valentina V. Utochnikova<sup>[a],[d]</sup>, Alexey A. Averin<sup>[b]</sup>, Tatiana R. Poliakova<sup>[a]</sup>, Mikhail A. Gerasimov<sup>[a]</sup>, Vladimir G. Petrov<sup>[a]</sup>, Yuri A. Ustynyuk<sup>[a]</sup>, Stepan N. Kalmykov<sup>[a]</sup>, Valentine G. Nenajdenko<sup>[a]\*</sup>

---

[a] Department of Chemistry, Lomonosov Moscow State University, Leninskie gory 1 bld. 3, Moscow, Russia E-mail: [svetlana.gutorova@chemistry.msu.ru](mailto:svetlana.gutorova@chemistry.msu.ru); [nenajdenko@gmail.com](mailto:nenajdenko@gmail.com)

[b] N.S. Kurnakov Institute of General and Inorganic Chemistry of the Russian Academy of Sciences, Moscow 119991, Russia

[c] Department of Materials Science Lomonosov Moscow State University, Leninskie gory 1 bld. 3, Moscow, Russia

[d] Russian Academy of Sciences, Frumkin Institute of Physical Chemistry, Moscow, 119072, Russia

## Contents

|                |   |
|----------------|---|
| UV-vis.....    | 2 |
| XRD data ..... | 3 |

## UV-vis

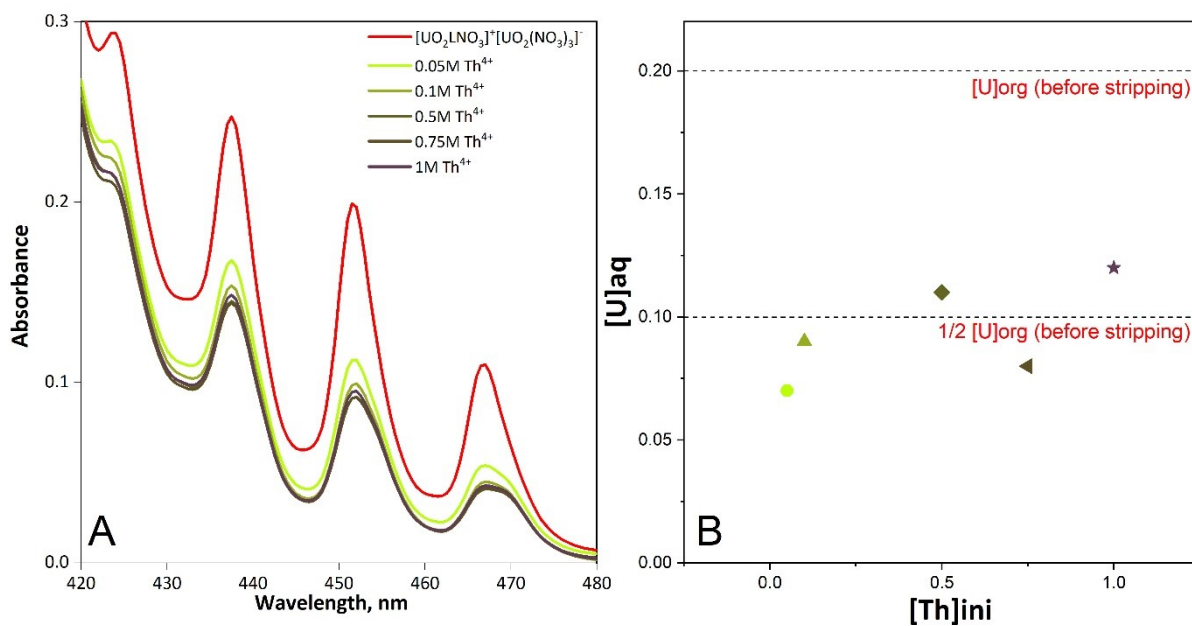

Figure S1. (A) UV-Vis absorption spectra of the organic phase of  $1 \text{ mol}\cdot\text{L}^{-1}$  U(VI) in  $3 \text{ mol}\cdot\text{L}^{-1}$   $\text{HNO}_3$  and after stripping with  $0.05$ ,  $0.1$ ,  $0.5$ ,  $0.75$  and  $1 \text{ mol}\cdot\text{L}^{-1}$  Th(IV). (B) The ratio of the concentration of U(VI) in the aqueous phase after extraction to the initial concentration of Th(IV). Organic phase:  $0.1 \text{ mol}\cdot\text{L}^{-1}$  L in F-3.

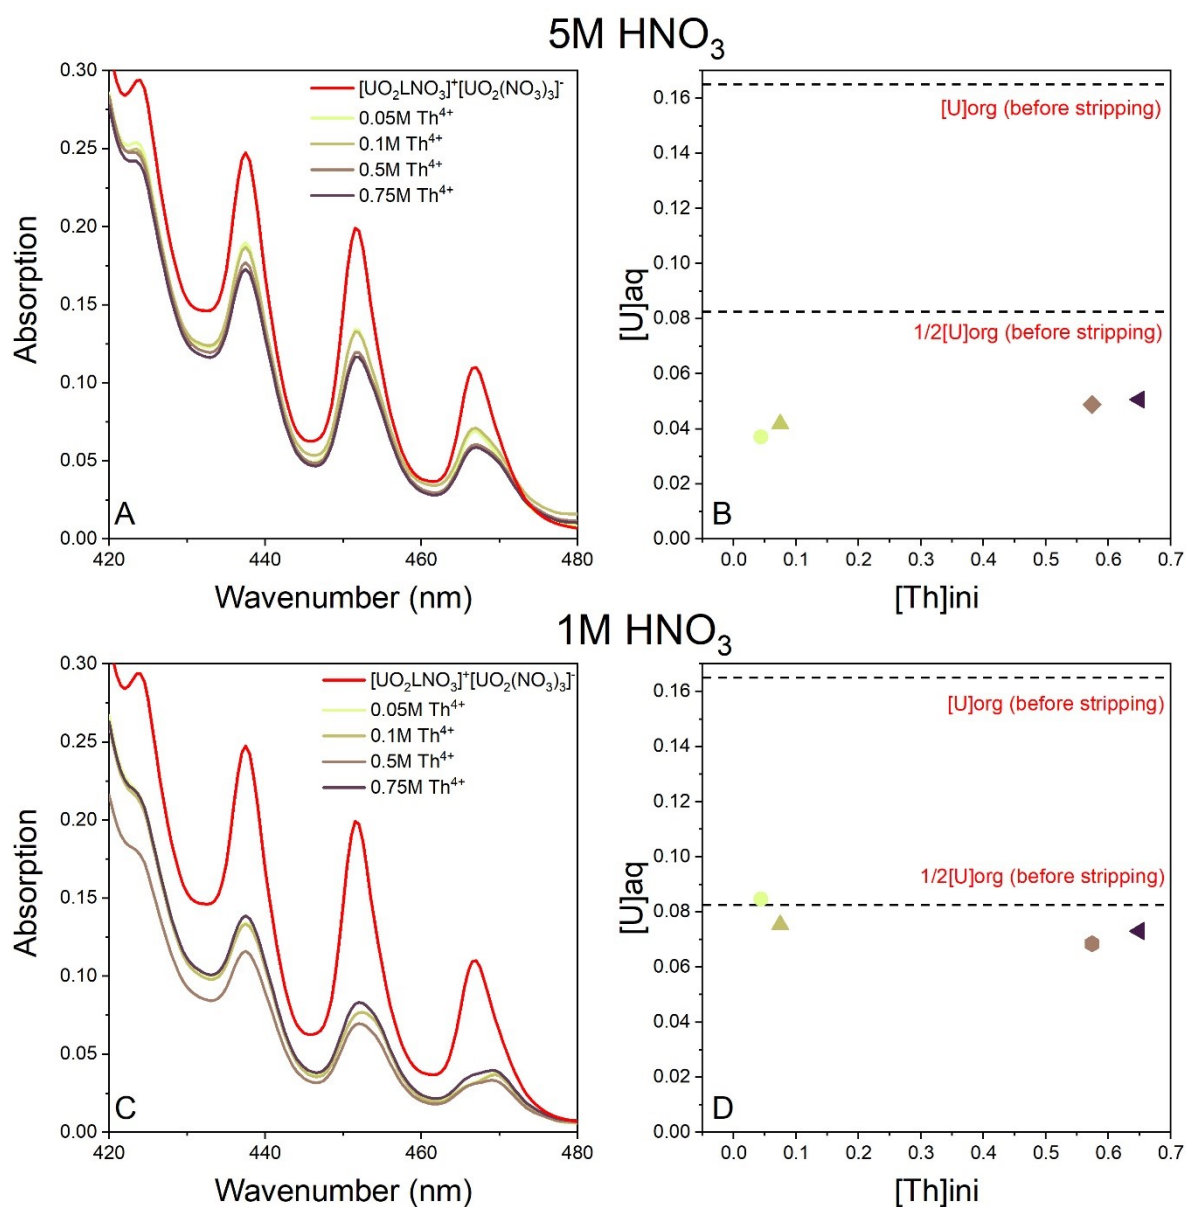

Figure S2. UV-Vis absorption spectra of the organic phase of 1 mol·L<sup>-1</sup> U(VI) in 3 mol·L<sup>-1</sup> and after stripping with 0.05, 0.1, 0.5 and 0.75 Th(IV) in 5 mol·L<sup>-1</sup> HNO<sub>3</sub> (A) and 1 mol·L<sup>-1</sup> HNO<sub>3</sub> (C). The ratio of the concentration of U(VI) in the aqueous phase after extraction to the initial concentration of Th(IV) in 5 mol·L<sup>-1</sup> HNO<sub>3</sub> (B) and 1 mol·L<sup>-1</sup> HNO<sub>3</sub> (D). Organic phase: 0.1 mol·L<sup>-1</sup> L in F-3.

## XRD data

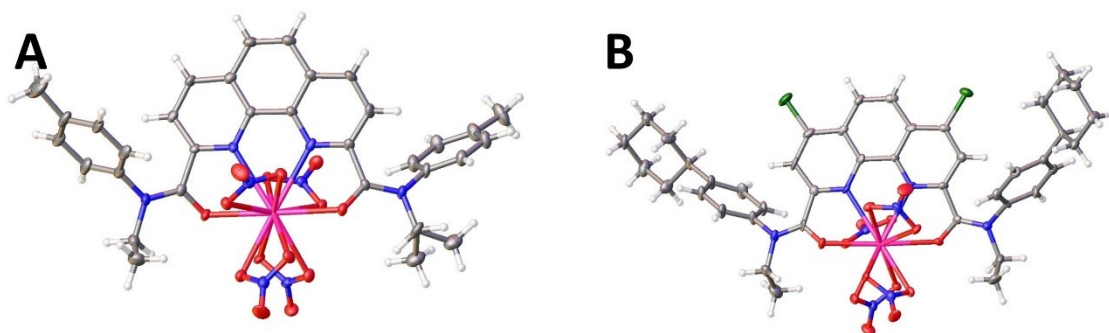

Figure S3 - General view of  $\text{ThL}(\text{NO}_3)_4$  (where **L** – different phenanthroline diamide-based ligands: **L5** and **L6**) in representation of atoms by thermal ellipsoids ( $p = 50\%$ ). Grey, blue, red, dark green and pink colors denote C, N, O, Cl and Th atoms, respectively.

Table S1 Crystallographic data for uranyl nitrate complex with **L0**.

|                                               |                                                                          |
|-----------------------------------------------|--------------------------------------------------------------------------|
| Empirical formula                             | $\text{C}_{30}\text{H}_{40}\text{Cl}_2\text{N}_8\text{O}_{18}\text{U}_2$ |
| Formula weight                                | 1347.66                                                                  |
| Crystal system                                | monoclinic                                                               |
| Space group                                   | $\text{P2}_1/\text{n}$                                                   |
| $a/\text{\AA}$                                | 16.0546(16)                                                              |
| $b/\text{\AA}$                                | 16.1875(14)                                                              |
| $c/\text{\AA}$                                | 18.9986(19)                                                              |
| $\alpha/^\circ$                               | 90                                                                       |
| $\beta/^\circ$                                | 112.367(3)                                                               |
| $\gamma/^\circ$                               | 90                                                                       |
| Volume/ $\text{\AA}^3$                        | 4566.0(8)                                                                |
| Z                                             | 4                                                                        |
| $\rho_{\text{calc}}/\text{g/cm}^3$            | 1.960                                                                    |
| $\mu/\text{mm}^{-1}$                          | 7.277                                                                    |
| F(000)                                        | 2552.0                                                                   |
| Crystal size/ $\text{mm}^3$                   | $0.21 \times 0.18 \times 0.02$                                           |
| $2\theta$ range for data collection/ $^\circ$ | 3.422 to 50                                                              |
| Index ranges                                  | $-15 \leq h \leq 19, -19 \leq k \leq 18, -22 \leq l \leq 22$             |
| Reflections collected                         | 29810                                                                    |
| Independent reflections                       | 8031 [ $R_{\text{int}} = 0.0549, R_{\text{sigma}} = 0.0521$ ]            |
| Data/restraints/parameters                    | 8031/47/554                                                              |
| Goodness-of-fit on $F^2$                      | 1.025                                                                    |
| Final R indexes [ $I \geq 2\sigma(I)$ ]       | $R_1 = 0.0777, wR_2 = 0.2096$                                            |
| Final R indexes [all data]                    | $R_1 = 0.0995, wR_2 = 0.2336$                                            |

Table S2 Crystallographic data for thorium nitrate complex with **L4**.

|                   |                                                                                      |
|-------------------|--------------------------------------------------------------------------------------|
| Empirical formula | $\text{C}_{37.5}\text{H}_{37}\text{Cl}_{3.5}\text{N}_{10.5}\text{O}_{14.5}\text{Th}$ |
| Formula weight    | 1222.89                                                                              |
| Crystal system    | triclinic                                                                            |
| Space group       | P-1                                                                                  |
| $a/\text{\AA}$    | 16.5634(7)                                                                           |
| $b/\text{\AA}$    | 17.5931(7)                                                                           |
| $c/\text{\AA}$    | 20.1553(8)                                                                           |

|                                                |                                                                |
|------------------------------------------------|----------------------------------------------------------------|
| $\alpha/^\circ$                                | 65.5780(10)                                                    |
| $\beta/^\circ$                                 | 75.7710(10)                                                    |
| $\gamma/^\circ$                                | 62.9860(10)                                                    |
| Volume/ $\text{\AA}^3$                         | 4752.1(3)                                                      |
| Z                                              | 4                                                              |
| $\rho_{\text{calc}}/\text{g}/\text{cm}^3$      | 1.709                                                          |
| $\mu/\text{mm}^{-1}$                           | 3.409                                                          |
| F(000)                                         | 2404.0                                                         |
| Crystal size/ $\text{mm}^3$                    | $0.22 \times 0.2 \times 0.17$                                  |
| 2 $\theta$ range for data collection/ $^\circ$ | 3.424 to 50                                                    |
| Index ranges                                   | $-19 \leq h \leq 19, -20 \leq k \leq 20, -23 \leq l \leq 23$   |
| Reflections collected                          | 32173                                                          |
| Independent reflections                        | 16607 [ $R_{\text{int}} = 0.0445, R_{\text{sigma}} = 0.0807$ ] |
| Data/restraints/parameters                     | 16607/49/1124                                                  |
| Goodness-of-fit on $F^2$                       | 0.979                                                          |
| Final R indexes [ $I \geq 2\sigma(I)$ ]        | $R_1 = 0.0399, wR_2 = 0.0755$                                  |
| Final R indexes [all data]                     | $R_1 = 0.0600, wR_2 = 0.0805$                                  |

Table S3 Crystallographic data for thorium nitrate complex with **L5**.

|                                                |                                                                |
|------------------------------------------------|----------------------------------------------------------------|
| Empirical formula                              | $\text{C}_{34}\text{H}_{36}\text{N}_9\text{O}_{15.5}\text{Th}$ |
| Formula weight                                 | 1050.76                                                        |
| Crystal system                                 | monoclinic                                                     |
| Space group                                    | $P2_1/n$                                                       |
| a/ $\text{\AA}$                                | 13.0013(4)                                                     |
| b/ $\text{\AA}$                                | 10.9427(3)                                                     |
| c/ $\text{\AA}$                                | 28.4236(9)                                                     |
| $\alpha/^\circ$                                | 90                                                             |
| $\beta/^\circ$                                 | 101.2730(10)                                                   |
| $\gamma/^\circ$                                | 90                                                             |
| Volume/ $\text{\AA}^3$                         | 3965.8(2)                                                      |
| Z                                              | 4                                                              |
| $\rho_{\text{calc}}/\text{g}/\text{cm}^3$      | 1.760                                                          |
| $\mu/\text{mm}^{-1}$                           | 3.842                                                          |
| F(000)                                         | 2068.0                                                         |
| Crystal size/ $\text{mm}^3$                    | $0.6 \times 0.22 \times 0.18$                                  |
| 2 $\theta$ range for data collection/ $^\circ$ | 3.242 to 53.998                                                |
| Index ranges                                   | $-16 \leq h \leq 15, -13 \leq k \leq 13, -36 \leq l \leq 36$   |
| Reflections collected                          | 31043                                                          |
| Independent reflections                        | 8645 [ $R_{\text{int}} = 0.0455, R_{\text{sigma}} = 0.0480$ ]  |
| Data/restraints/parameters                     | 8645/64/545                                                    |
| Goodness-of-fit on $F^2$                       | 1.132                                                          |
| Final R indexes [ $I \geq 2\sigma(I)$ ]        | $R_1 = 0.0369, wR_2 = 0.0896$                                  |
| Final R indexes [all data]                     | $R_1 = 0.0465, wR_2 = 0.0925$                                  |

Table S4 Crystallographic data for thorium nitrate complex with **L6**.

|                   |                                                                         |
|-------------------|-------------------------------------------------------------------------|
| Empirical formula | $\text{C}_{43}\text{H}_{46}\text{Cl}_3\text{N}_8\text{O}_{14}\text{Th}$ |
| Formula weight    | 1237.27                                                                 |
| Crystal system    | monoclinic                                                              |
| Space group       | $P2_1/n$                                                                |
| a/ $\text{\AA}$   | 12.1106(8)                                                              |
| b/ $\text{\AA}$   | 25.9428(18)                                                             |

|                                                |                                                               |
|------------------------------------------------|---------------------------------------------------------------|
| c/Å                                            | 16.7328(11)                                                   |
| $\alpha/^\circ$                                | 90                                                            |
| $\beta/^\circ$                                 | 99.142(2)                                                     |
| $\gamma/^\circ$                                | 90                                                            |
| Volume/Å <sup>3</sup>                          | 5190.4(6)                                                     |
| Z                                              | 4                                                             |
| $\rho_{\text{calc}}/\text{g}/\text{cm}^3$      | 1.583                                                         |
| $\mu/\text{mm}^{-1}$                           | 3.096                                                         |
| F(000)                                         | 2452.0                                                        |
| Crystal size/mm <sup>3</sup>                   | 0.33 × 0.16 × 0.04                                            |
| 2 $\theta$ range for data collection/ $^\circ$ | 3.75 to 49.994                                                |
| Index ranges                                   | -14 ≤ h ≤ 14, -30 ≤ k ≤ 30, -19 ≤ l ≤ 18                      |
| Reflections collected                          | 30699                                                         |
| Independent reflections                        | 9142 [R <sub>int</sub> = 0.0758, R <sub>sigma</sub> = 0.0820] |
| Data/restraints/parameters                     | 9142/18/624                                                   |
| Goodness-of-fit on F <sup>2</sup>              | 1.028                                                         |
| Final R indexes [I >= 2 $\sigma$ (I)]          | R <sub>1</sub> = 0.0426, wR <sub>2</sub> = 0.0766             |
| Final R indexes [all data]                     | R <sub>1</sub> = 0.0731, wR <sub>2</sub> = 0.0836             |

Table S5 Crystallographic data for mixed uranium-thorium complex with **L0**.

|                                                |                                                                                                  |
|------------------------------------------------|--------------------------------------------------------------------------------------------------|
| Empirical formula                              | C <sub>74</sub> H <sub>96</sub> Cl <sub>4</sub> N <sub>16</sub> O <sub>32</sub> ThU <sub>2</sub> |
| Formula weight                                 | 2571.56                                                                                          |
| Crystal system                                 | monoclinic                                                                                       |
| Space group                                    | C2/c                                                                                             |
| a/Å                                            | 31.6621(12)                                                                                      |
| b/Å                                            | 19.8030(8)                                                                                       |
| c/Å                                            | 32.2455(11)                                                                                      |
| $\alpha/^\circ$                                | 90                                                                                               |
| $\beta/^\circ$                                 | 93.9240(10)                                                                                      |
| $\gamma/^\circ$                                | 90                                                                                               |
| Volume/Å <sup>3</sup>                          | 20170.7(13)                                                                                      |
| Z                                              | 8                                                                                                |
| $\rho_{\text{calc}}/\text{g}/\text{cm}^3$      | 1.694                                                                                            |
| $\mu/\text{mm}^{-1}$                           | 4.862                                                                                            |
| F(000)                                         | 10000.0                                                                                          |
| Crystal size/mm <sup>3</sup>                   | 0.2 × 0.16 × 0.05                                                                                |
| 2 $\theta$ range for data collection/ $^\circ$ | 3.444 to 52.866                                                                                  |
| Index ranges                                   | -39 ≤ h ≤ 37, -24 ≤ k ≤ 24, -39 ≤ l ≤ 40                                                         |
| Reflections collected                          | 83531                                                                                            |
| Independent reflections                        | 20699 [R <sub>int</sub> = 0.0626, R <sub>sigma</sub> = 0.0587]                                   |
| Data/restraints/parameters                     | 20699/45/1164                                                                                    |
| Goodness-of-fit on F <sup>2</sup>              | 1.039                                                                                            |
| Final R indexes [I >= 2 $\sigma$ (I)]          | R <sub>1</sub> = 0.0486, wR <sub>2</sub> = 0.1076                                                |
| Final R indexes [all data]                     | R <sub>1</sub> = 0.0728, wR <sub>2</sub> = 0.1172                                                |

Table S6 Crystallographic data for mixed uranium-thorium nitrate complex with **L8**.

|                   |                                                                                                  |
|-------------------|--------------------------------------------------------------------------------------------------|
| Empirical formula | C <sub>68</sub> H <sub>56</sub> Cl <sub>4</sub> N <sub>16</sub> O <sub>32</sub> ThU <sub>2</sub> |
| Formula weight    | 2459.18                                                                                          |
| Crystal system    | monoclinic                                                                                       |
| Space group       | P2 <sub>1</sub> /n                                                                               |
| a/Å               | 13.3179(5)                                                                                       |

|                                                |                                                                   |
|------------------------------------------------|-------------------------------------------------------------------|
| b/Å                                            | 10.8403(4)                                                        |
| c/Å                                            | 31.2259(11)                                                       |
| $\alpha/^\circ$                                | 90                                                                |
| $\beta/^\circ$                                 | 90.3840(10)                                                       |
| $\gamma/^\circ$                                | 90                                                                |
| Volume/Å <sup>3</sup>                          | 4508.0(3)                                                         |
| Z                                              | 2                                                                 |
| $\rho_{\text{calc}}/\text{g}/\text{cm}^3$      | 1.812                                                             |
| $\mu/\text{mm}^{-1}$                           | 5.434                                                             |
| F(000)                                         | 2348.0                                                            |
| Crystal size/mm <sup>3</sup>                   | 0.23 × 0.12 × 0.07                                                |
| 2 $\Theta$ range for data collection/ $^\circ$ | 3.978 to 55.996                                                   |
| Index ranges                                   | -17 ≤ h ≤ 17, -14 ≤ k ≤ 14, -41 ≤ l ≤ 41                          |
| Reflections collected                          | 60599                                                             |
| Independent reflections                        | 10730 [ $R_{\text{int}} = 0.0432$ , $R_{\text{sigma}} = 0.0339$ ] |
| Data/restraints/parameters                     | 10730/0/556                                                       |
| Goodness-of-fit on F <sup>2</sup>              | 1.051                                                             |
| Final R indexes [ $I \geq 2\sigma(I)$ ]        | $R_1 = 0.0325$ , $wR_2 = 0.0702$                                  |
| Final R indexes [all data]                     | $R_1 = 0.0416$ , $wR_2 = 0.0731$                                  |
